# Supplementary material for: Electrochemical sensor using poly-(l-cysteine) functionalized CuO nanoneedles/N-doped reduced graphene oxide for detection of lead ions
Source: Royal Society of Chemistry journal article supplement (doi:10.1039/d0ra03149f), 2020-01-01
Supplement: d0ra03149f1.pdf [file d0ra03149f1.pdf]

## Supporting Information

### **Electrochemical sensor using poly-(L-cysteine) functionalized CuO nanoneedles/N-doped reduced graphene oxide for detection of lead ion**

**Suling Yang<sup>a, b\*</sup>, Panpan Liu<sup>a, b</sup>, Yuxin Wang<sup>a, b</sup>, Ziling Guo<sup>a, b</sup>, Ruifan Tan<sup>a, b</sup>, Lingbo Qu<sup>a, b, c</sup>**

*<sup>a</sup> College of Chemistry and Chemical Engineering, Anyang Normal University, Anyang 455002, PR China*

*<sup>b</sup> Henan Key Laboratory of New Opto-electronic Functional Materials*

*<sup>c</sup> College of Chemistry and Molecular Engineering, Zhengzhou University, Zhengzhou 450001, PR China*

---

\* Corresponding author. Tel.: +86 03722900040; Fax: +86 3722900040  
E-mail address: [yang\\_suling@163.com](mailto:yang_suling@163.com)

Figure S1

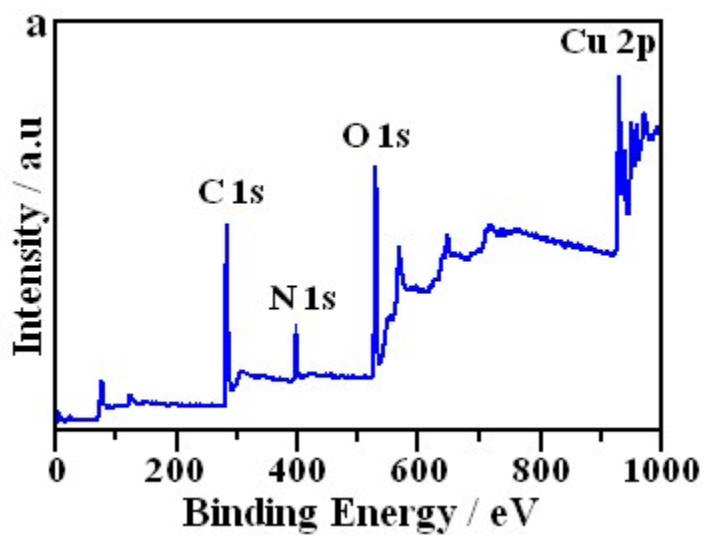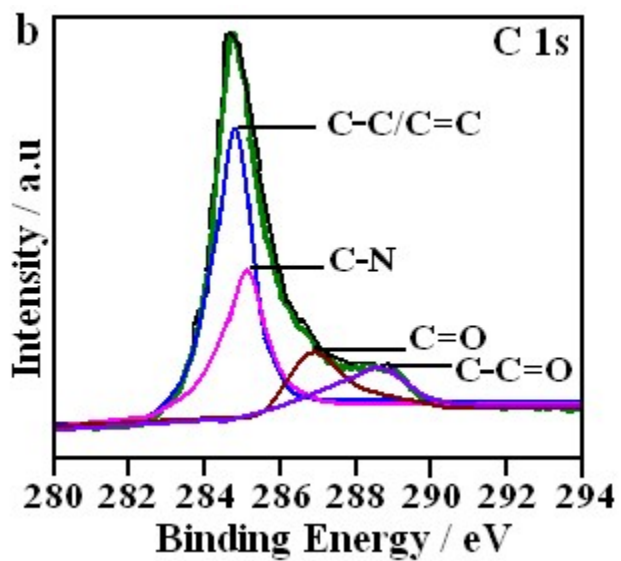

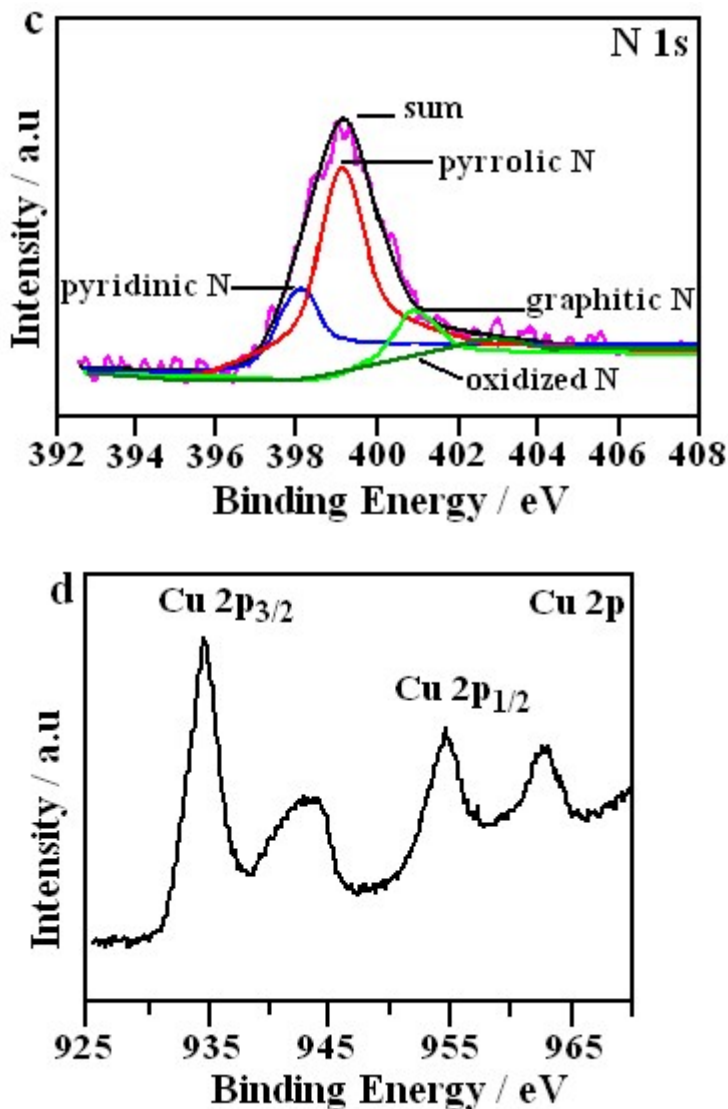

**Figure S1.** XPS spectra of NN-CuO/N-rGO (a) and its C 1s (b), N 1s (c) and Cu 2p (d) spectra.

Figure S1 shows XPS spectra of the nanocomposite. In the survey region (0–1000 eV) (Figure S1a), it clearly demonstrates the presence of C, O, and Cu elements in the sample. Figure S1b shows a high-resolution spectrum of C, it can be fitted into four peaks at 284.4, 285.4, 286.3 and 288.5eV, which are referred to C–C/C=C, C–N, C=O, and C–C=O vibrations, respectively [1]. One can see obviously that the peak intensity of C=O and C–C=O is much weaker than that of C–C, indicating that most of the oxygen-containing groups have been removed after hydrothermal treatment [2]. The high resolution N1s spectra (Figure S1c) for the nanocomposite shows four bands at 398.0, 398.8, 401.0 and 403.2 eV, corresponding to the pyridine-like structures N, pyrrolic or amine moieties N, graphitic N and weak oxidized N [3],

respectively. Notably, the amount of N incorporated in the nanocomposite was found to be approximately 6.94% with a high doping level. Figure S1d is the high-resolution spectrum of Cu element. The peaks observed at 934.6 and 954.5 eV are assigned to Cu 2p<sub>3/2</sub> and Cu 2p<sub>1/2</sub>, which are attributed to oxidized Cu (II) [4]. Additionally, two satellite peaks at 943.7 and 962.7 eV, further confirm that the oxide in the sample are CuO [2], which reveals that the NN-CuO have formed in the nanocomposite.

**Figure S2**

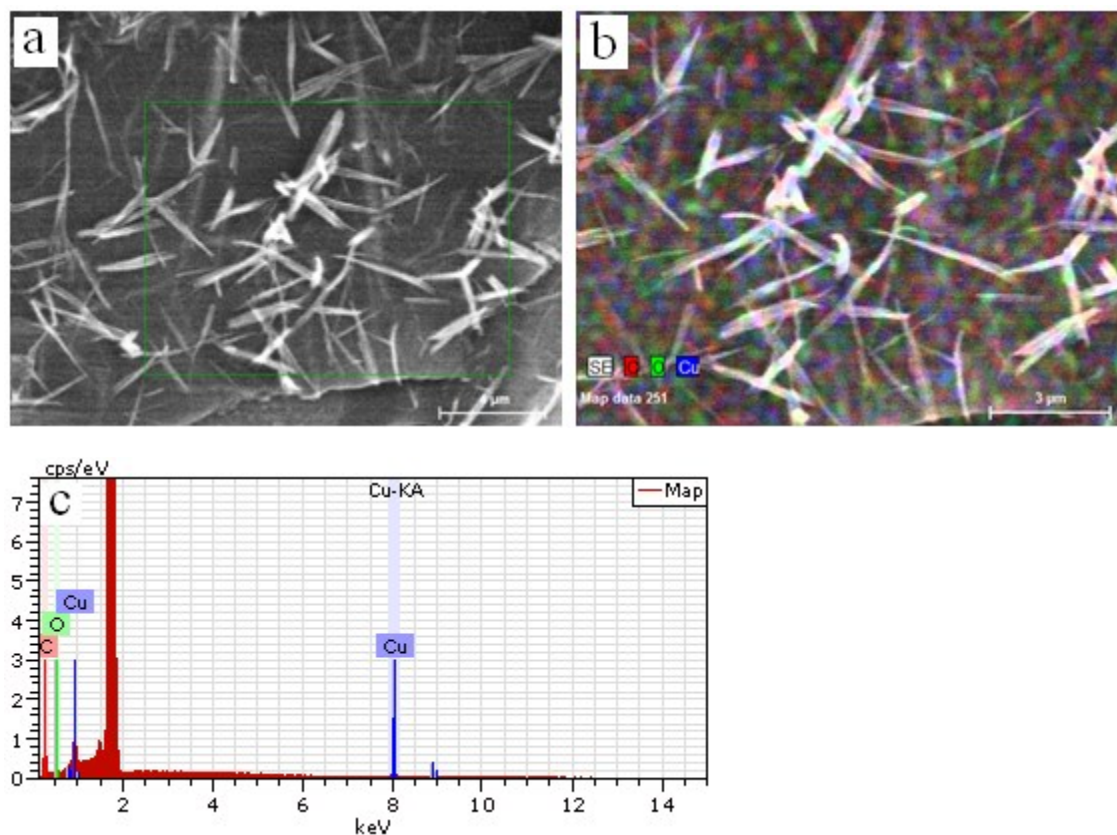

**Figure S2** EDS mapping images of NN-CuO/N-rGO.

From the EDS examination (Figure S2), the elemental composition was confirmed the presence of C, O and Cu elements which have an uniform distribution within nanocomposite.

References:

- [1] Y. Zhang, S.S. Yuan, Y.H. Zhao, H.G. Wang, C.D. He, Synthesis of novel yttrium-doped graphene oxide nanocomposite for dye removal. *J. Mater. Chem. A* 2 (2014)7897–7903.

- [2] Y. Liu, W. Wang, L. Gu, Y.W. Wang, Y.L. Ying, Y.Y. Mao, L.W. Sun, X.S. Peng, Flexible CuO nanosheets/reduced-graphene oxide composite paper: binder-free anode for high-performance Lithium-ion batteries, *ACS Appl. Mater. Interfaces* 5 (2013) 9850–9855.
- [3] D. Long, W. Li, L. Ling, J. Miyawaki, I. Mochida, S.H. Yoon, Preparation of nitrogen-doped graphene sheets by a combined chemical and hydrothermal reduction of graphene oxide, *Langmuir* 26 (2010) 16096–16102.
- [4] M. Durando, R. Morrish, A.J. Muscat, Kinetics and mechanism for the reaction of Hexafluoroacetylacetone with CuO in supercritical carbon dioxide, *J. Am. Chem. Soc.* 130 (2008) 16659–16668.
